# Supplementary material
Source: PubMed Central journal article supplement (PMC8995355)
Supplement: NIHMS1783404-supplement-1.pdf [file NIHMS1783404-supplement-1.pdf]

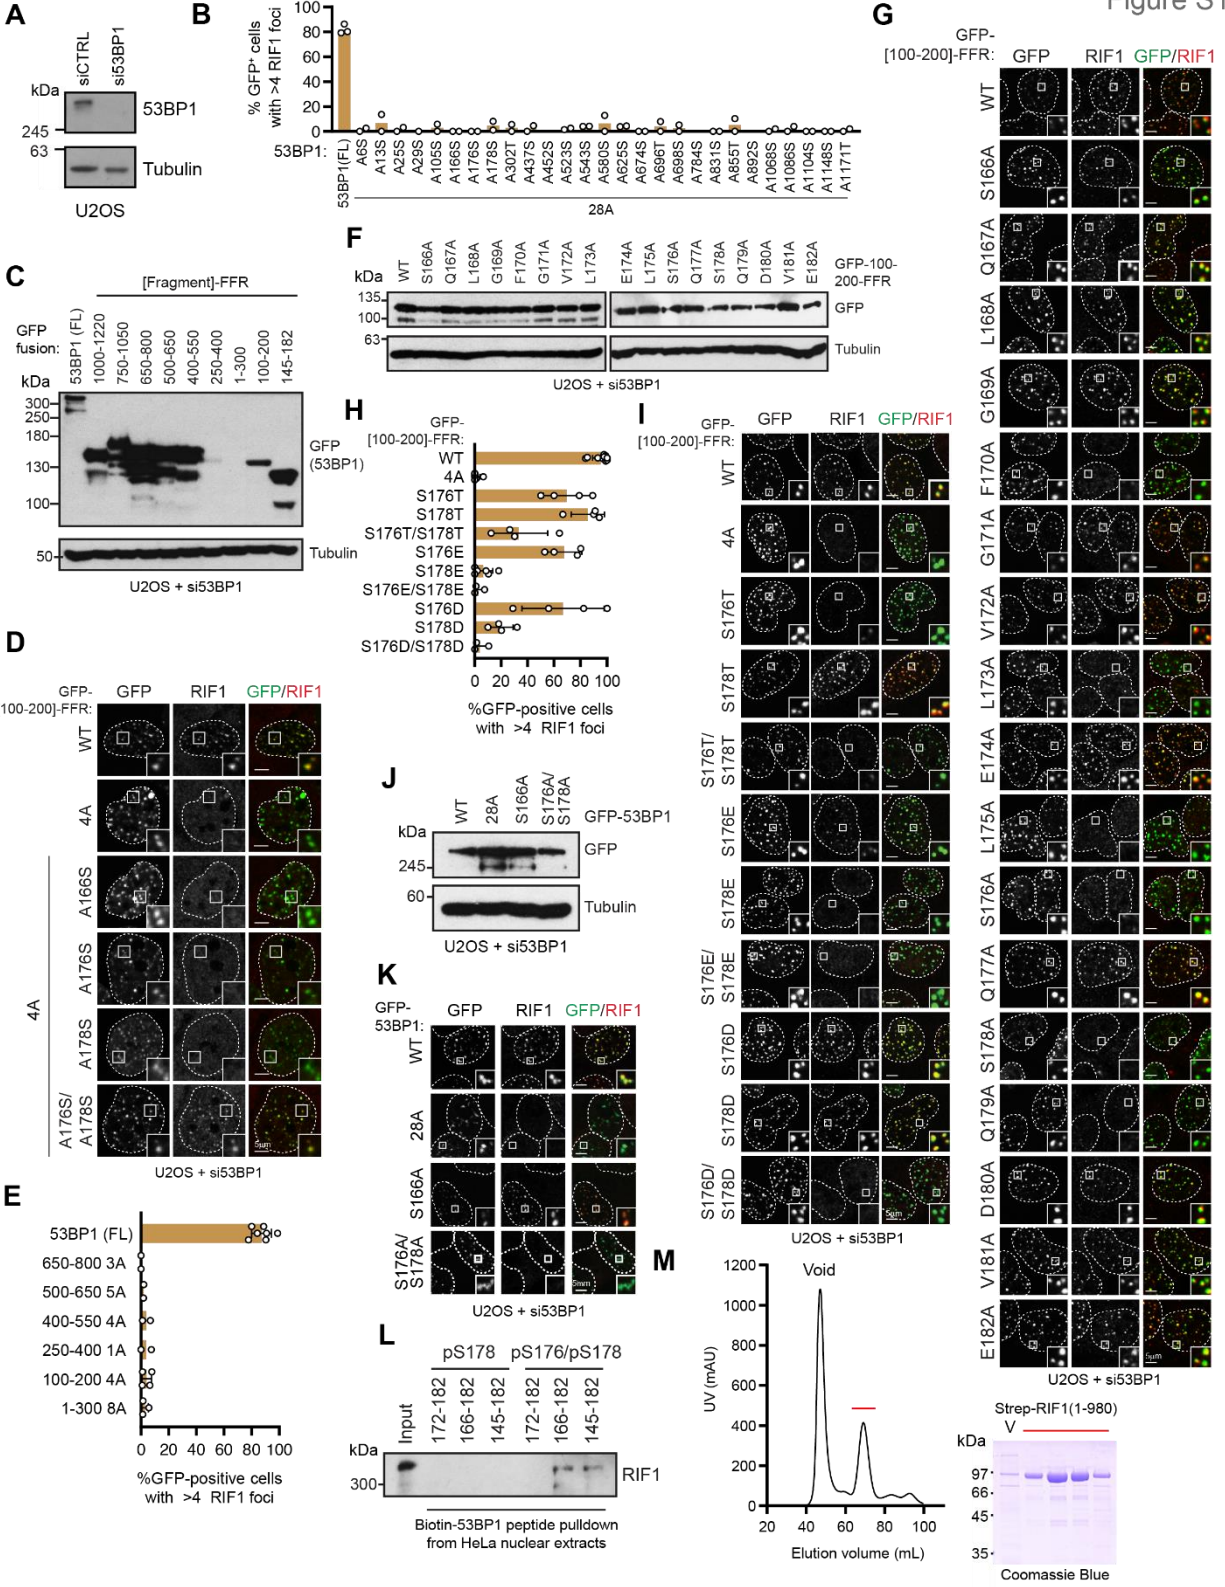

**Figure S1. RIF1 directly binds doubly-phosphorylated 53BP1 N-terminal motifs, related to Figure 1**

(A) Immunoblotting of whole cell extracts of U2OS cells transfected with a non-targeting siRNA (siCTRL) or an siRNA targeting 53BP1. Tubulin was used as a loading control.

(B) U2OS cells transfected with siRNA targeting 53BP1 were subsequently transfected with plasmids encoding wild type (WT) 53BP1 or the indicated 53BP1<sup>28A</sup> reversion mutant. RIF1 focus formation 1 h post-IR (10 Gy) was evaluated by immunofluorescence. N=3 (53BP1 FL), all else N=2.

(C) Immunoblotting of whole cell extracts of U2OS cells expressing truncated GFP-53BP1 variants shown in [Figure 1B](#). Tubulin was used as a loading control.

(D) Representative micrographs of RIF1 IR-induced focus formation data shown in [Figure 1C](#).

(E) Analysis of RIF1 IR-induced focus formation in U2OS cells expressing the indicated 53BP1 variants 1 h post-IR treatment (10 Gy). Bar length corresponds to mean  $\pm$  s.d.; N=7 (53BP1 FL), N=4 (100-200 4A), N=3 (1-300 8A), all else N=2.

(F) Immunoblotting of whole cell extracts of U2OS cells expressing GFP-[100-200]-FFR variants shown in [Figure 1D](#). Tubulin was used as a loading control.

(G) Representative micrographs of RIF1 IR-induced focus formation data shown in [Figure 1D](#).

(H) Analysis of RIF1 IR-induced focus formation in U2OS cells expressing the indicated 53BP1 [100-200]-FFR mutants, 1h post-IR (10 Gy). Bar length corresponds to mean  $\pm$  s.d.; N=10 (WT), N=6 (4A, S178E), N=3 (S176E/S178E, S176D/S178D), all else N=4.

(I) Representative micrographs of the RIF1 IR-induced focus formation data shown in (H).

(J) Immunoblotting of whole cell extracts of U2OS cells expressing the full-length GFP-53BP1 variants shown in [Figure 1F](#). Tubulin was used as a loading control.

(K) Representative micrographs of the RIF1 IR-induced focus formation data shown in [Figure 1F](#).

(L) Streptavidin pulldown assay using the indicated biotinylated 53BP1 phosphopeptides incubated with HeLa nuclear extracts. Bound proteins were analyzed by immunoblotting with a RIF1 antibody.

(M) Purification of RIF1(1-980) from insect cells by streptactin affinity pulldown and size exclusion chromatography. Left: Chromatogram from size exclusion chromatography of recombinant RIF1(1-980). Red line indicates the residues analyzed by Coomassie Blue SDS-PAGE (right). V indicates sample from void peak.

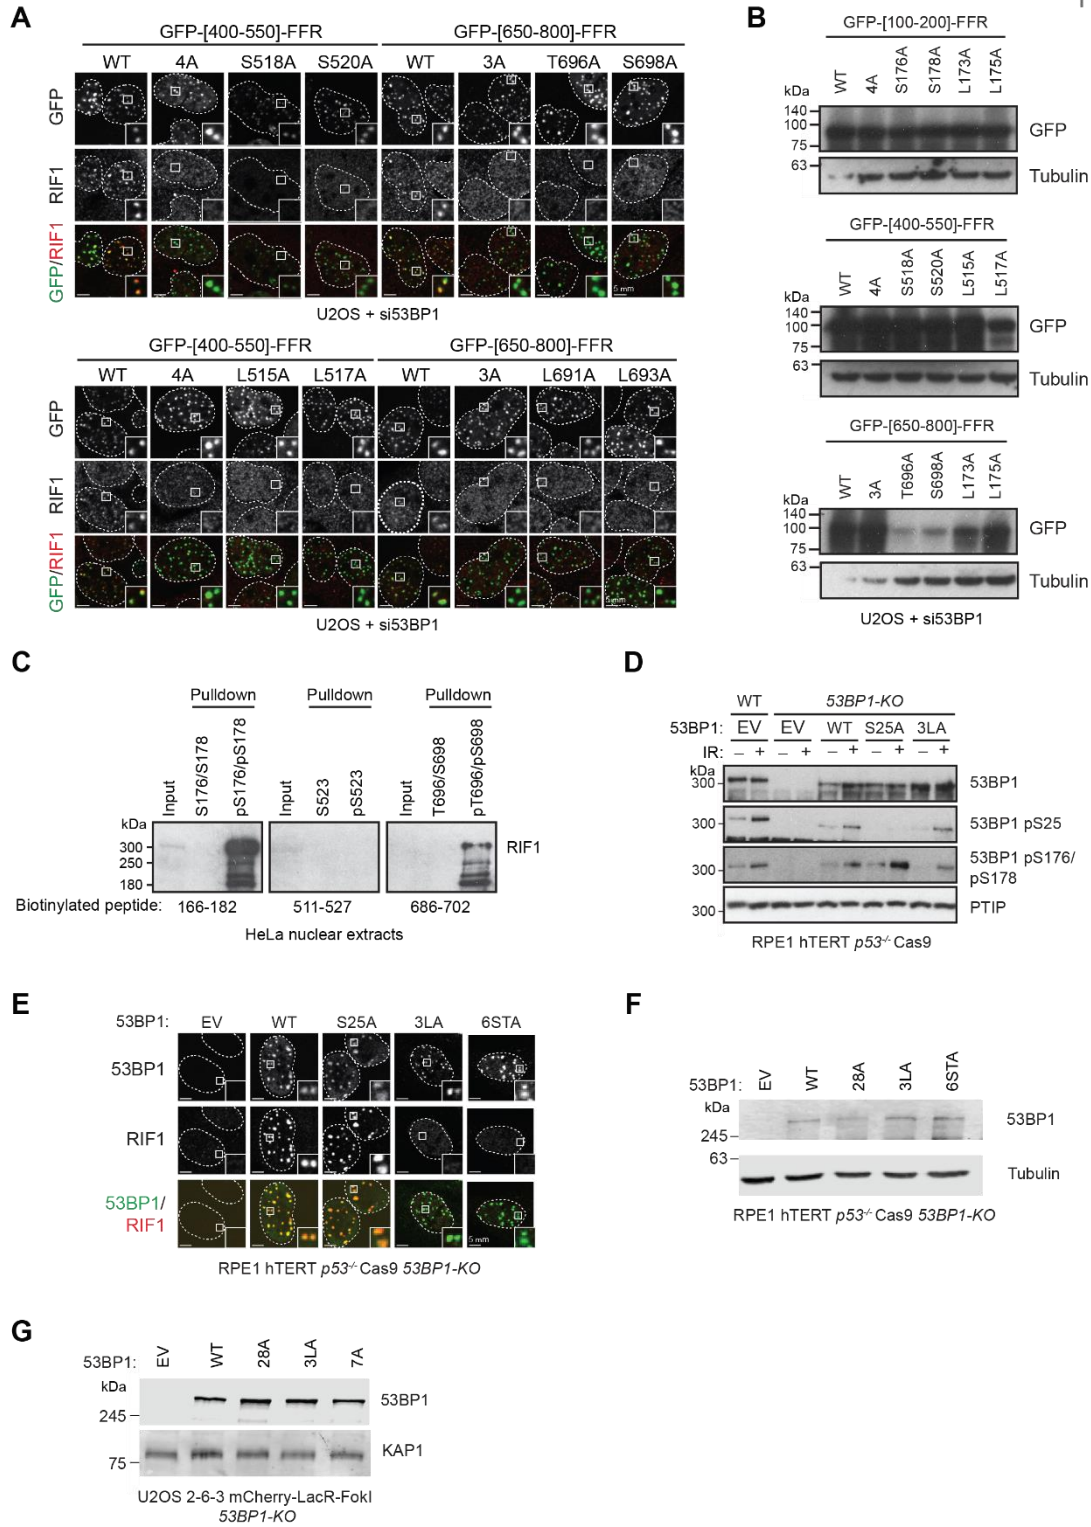

**Figure S2. Characterization of additional RIF1-binding 53BP1 phosphopeptides, related to Figure 2**

(A) Representative micrographs of the RIF1 IR-induced focus formation data shown in [Figure 2B](#).

(B) Immunoblotting of whole cell extracts expressing the GFP-53BP1 variants used in (A). Tubulin was used as a loading control.

(C) Streptavidin pulldown assay using biotinylated 53BP1 phosphopeptides incubated with HeLa nuclear extracts. Bound proteins were analyzed by immunoblotting with a RIF1 antibody.

(D) Immunoblotting of whole cell extracts of wild-type (WT) or *53BP1-KO* RPE1-hTERT *p53*<sup>-/-</sup> Cas9 cells expressing the indicated 53BP1 variants harvested 1 h post-IR (10 Gy). EV, empty vector.

(E) Representative micrographs of the RIF1 IR-induced focus formation data shown in [Figure 2E](#).

(F) Immunoblotting of whole cell extracts of RPE1-hTERT *p53*<sup>-/-</sup> Cas9 *53BP1-KO* cells expressing the indicated 53BP1 variants used in [Figure 2E](#). Tubulin was used as a loading control.

(G) Immunoblotting of whole cell extracts U2OS 2-6-3 *53BP1-KO* cells expressing the indicated 53BP1 variants used in [Figures 2G-H](#). KAP1 was used as a loading control.



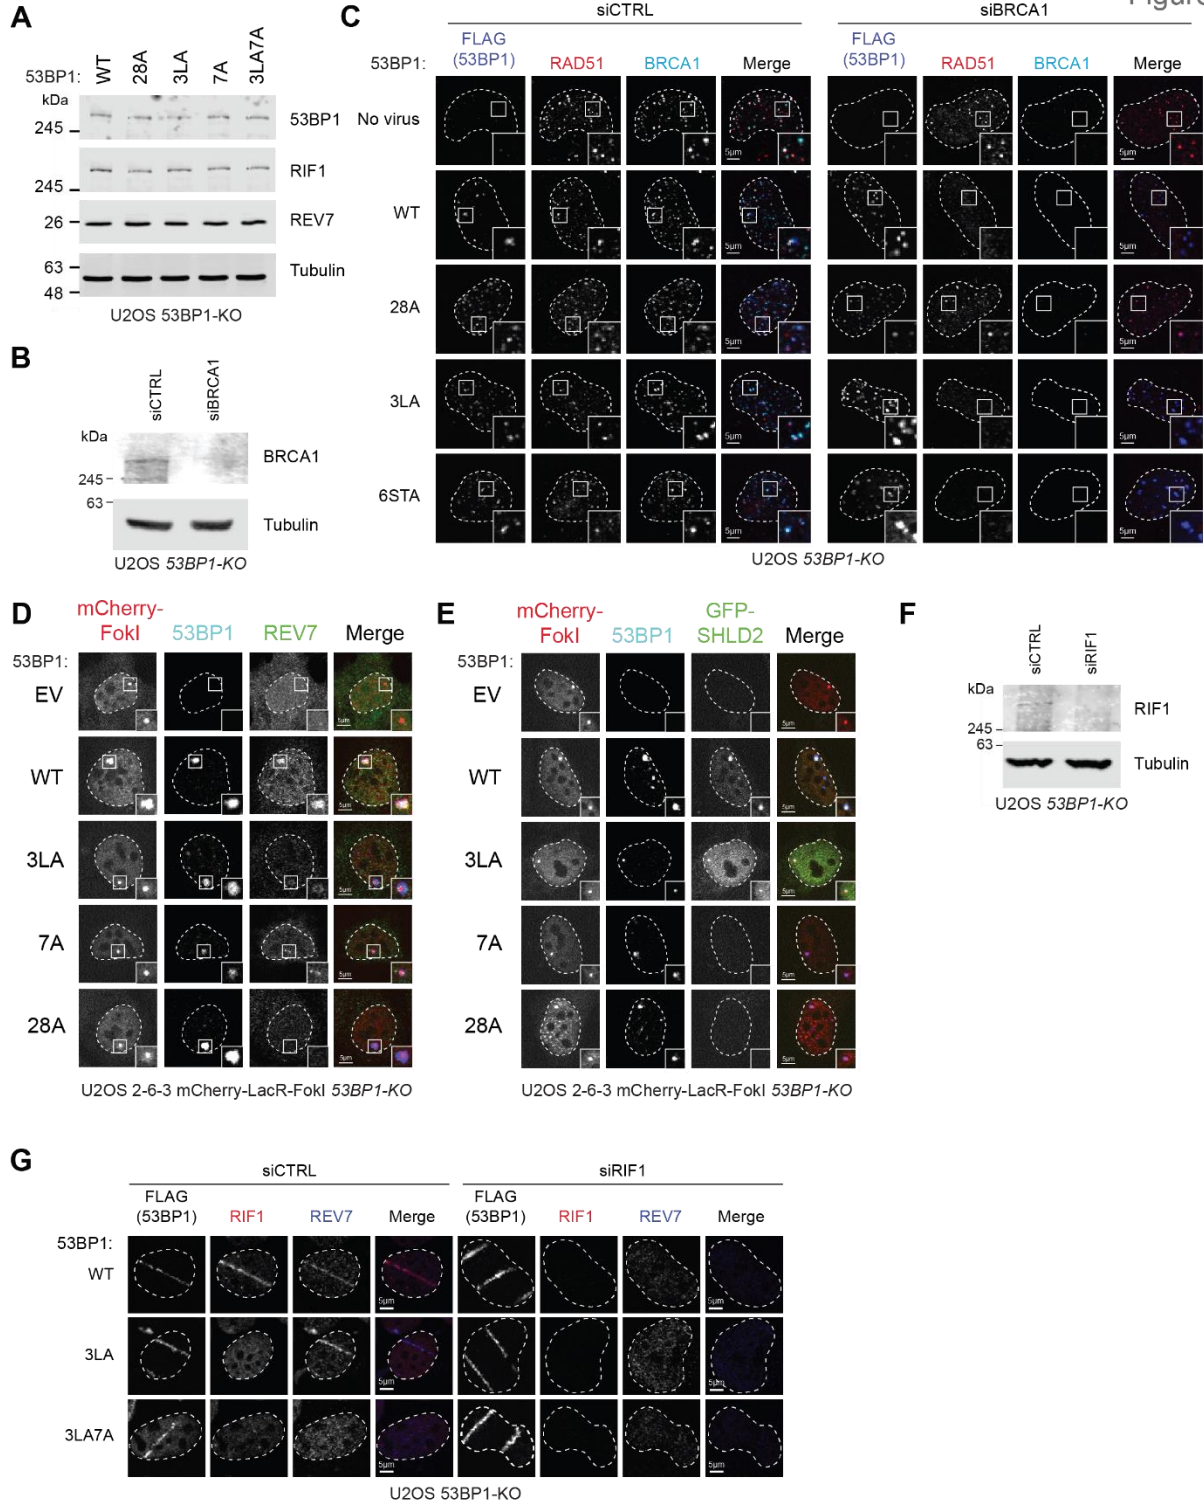

**Figure S3. Effect of disrupting RIF1-binding 53BP1 phosphopeptides on HR suppression and shieldin recruitment, related to Figure 3**

- (A) Immunoblotting of whole cell extracts of U2OS *53BP1-KO* cells infected with retroviruses encoding the indicated 53BP1 variants used in [Figure 3A](#). Tubulin was used as a loading control.
- (B) Immunoblotting of U2OS *53BP1-KO* cells transfected with non-targeting (siCTRL) or BRCA1-targeting (siBRCA1) siRNAs. Tubulin was used as a loading control.
- (C) Representative micrographs of the RAD51 IR-induced focus formation data shown in [Figure 3A](#).
- (D) Representative micrographs of the REV7 and FokI-induced DSB colocalization data shown in [Figure 3B](#). EV, empty vector.
- (E) Representative micrographs of the GFP-SHLD2 and FokI-induced DSB colocalization data shown in [Figure 3C](#).
- (F) Immunoblotting of whole cell extracts of U2OS *53BP1-KO* cells transfected with non-targeting (siCTRL) or RIF1-targeting (siRIF1) siRNAs. Tubulin was used as a loading control.
- (G) Representative micrographs of the REV7 colocalization with UV laser microirradiation tracks in RIF1-depleted cells shown in [Figure 3G](#).

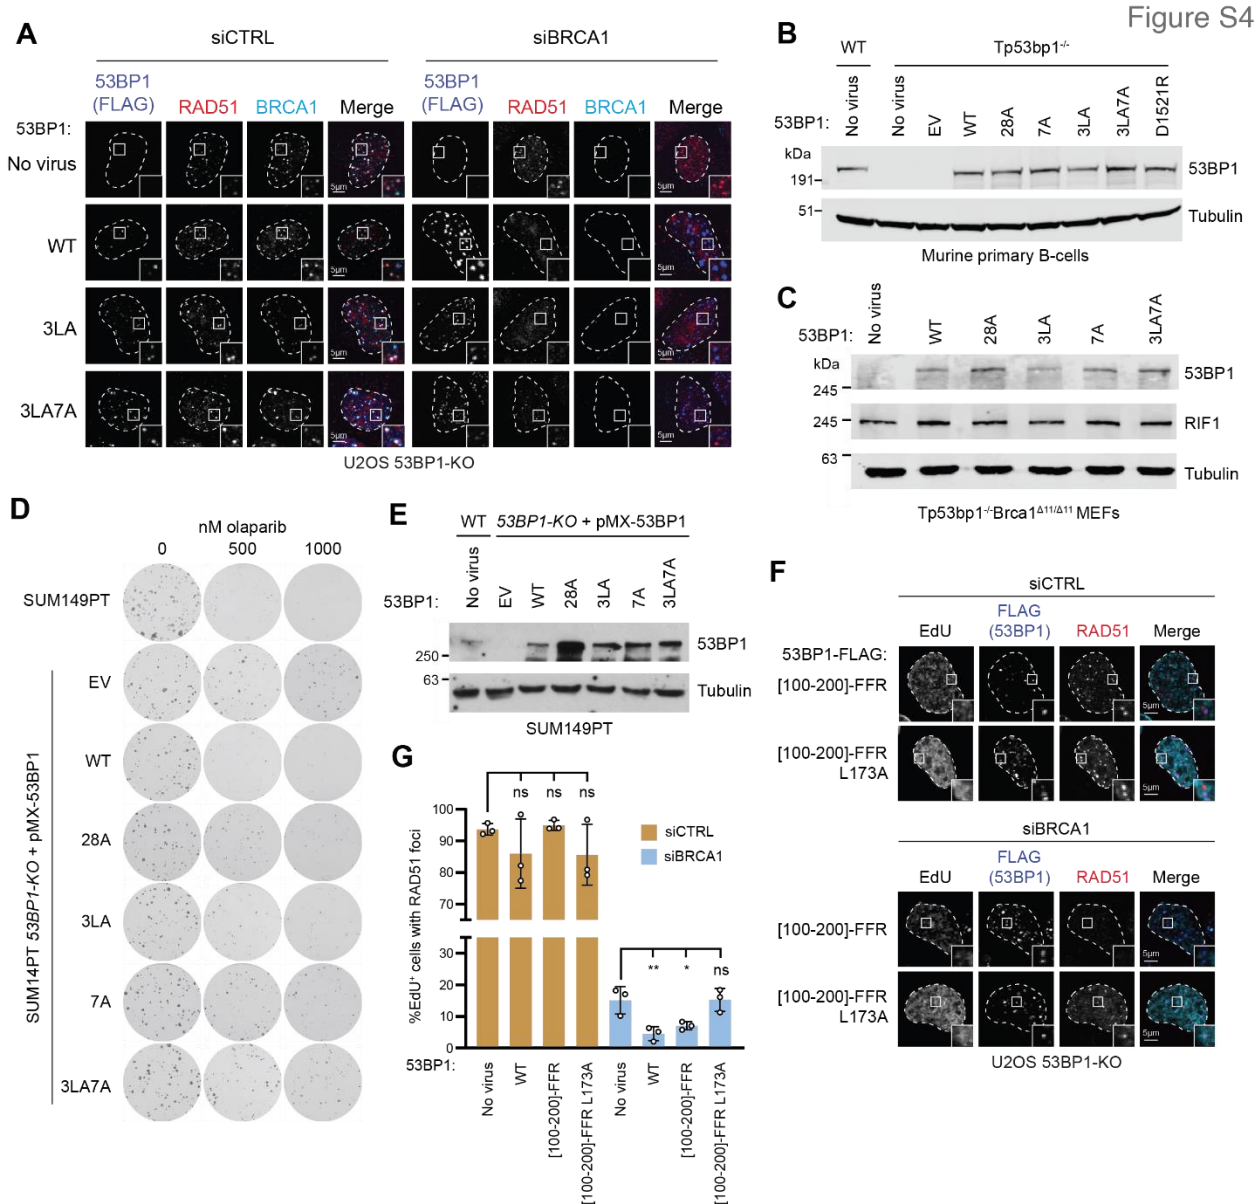

**Figure S4. Effect of disrupting both RIF1 and shieldin recruitment on 53BP-mediated DNA repair, related to Figure 4.**

(A) Representative micrographs of the RAD51 IR-induced focus formation data shown in Figure 4A.

(B) Immunoblotting of whole cell extracts of *Tp53bp1*<sup>-/-</sup> mouse splenic B-cells infected with retrovirus encoding the indicated 53BP1-FLAG constructs used in Figures 4B-C. Tubulin was used as a loading control.



(C) Immunoblotting of whole cell extracts of mouse embryonic fibroblasts isolated from *Tp53bp1<sup>-/-</sup>Brca1<sup>Δ11/Δ11</sup>* mice infected with retroviruses encoding the indicated 53BP1-FLAG constructs used in [Figures 4D-E](#). Tubulin was used as a loading control.

(D-E) Clonogenic survival assay of SUM149PT *53BP1-KO* cells infected with retrovirus encoding the indicated 53BP1-FLAG constructs 9 d after olaparib treatment. Whole cell extracts were analyzed by immunoblotting in (E), tubulin was used as a loading control. Quantitation is shown in [Figure 4F](#). EV, empty vector.

(F-G) U2OS *53BP1-KO* cells were infected with retroviruses encoding the indicated 53BP1-FLAG constructs and transfected with a non-targeting siRNA (siCTRL) or an siRNA against BRCA1. Cells were treated with IR (5 Gy), and after 3.5 h were treated with EdU for 30 min. RAD51 foci in EdU-positive cells were then evaluated by immunofluorescence. Representative micrographs (F) and quantitation (G) are shown. Bar height corresponds to the mean  $\pm$  s.d. N=3. \*  $p < 0.05$ , \*\*  $p < 0.01$ . ns, not significant. Two-tailed unpaired t-tests were done relative to uninfected U2OS *53BP1-KO* cells.

Figure S5

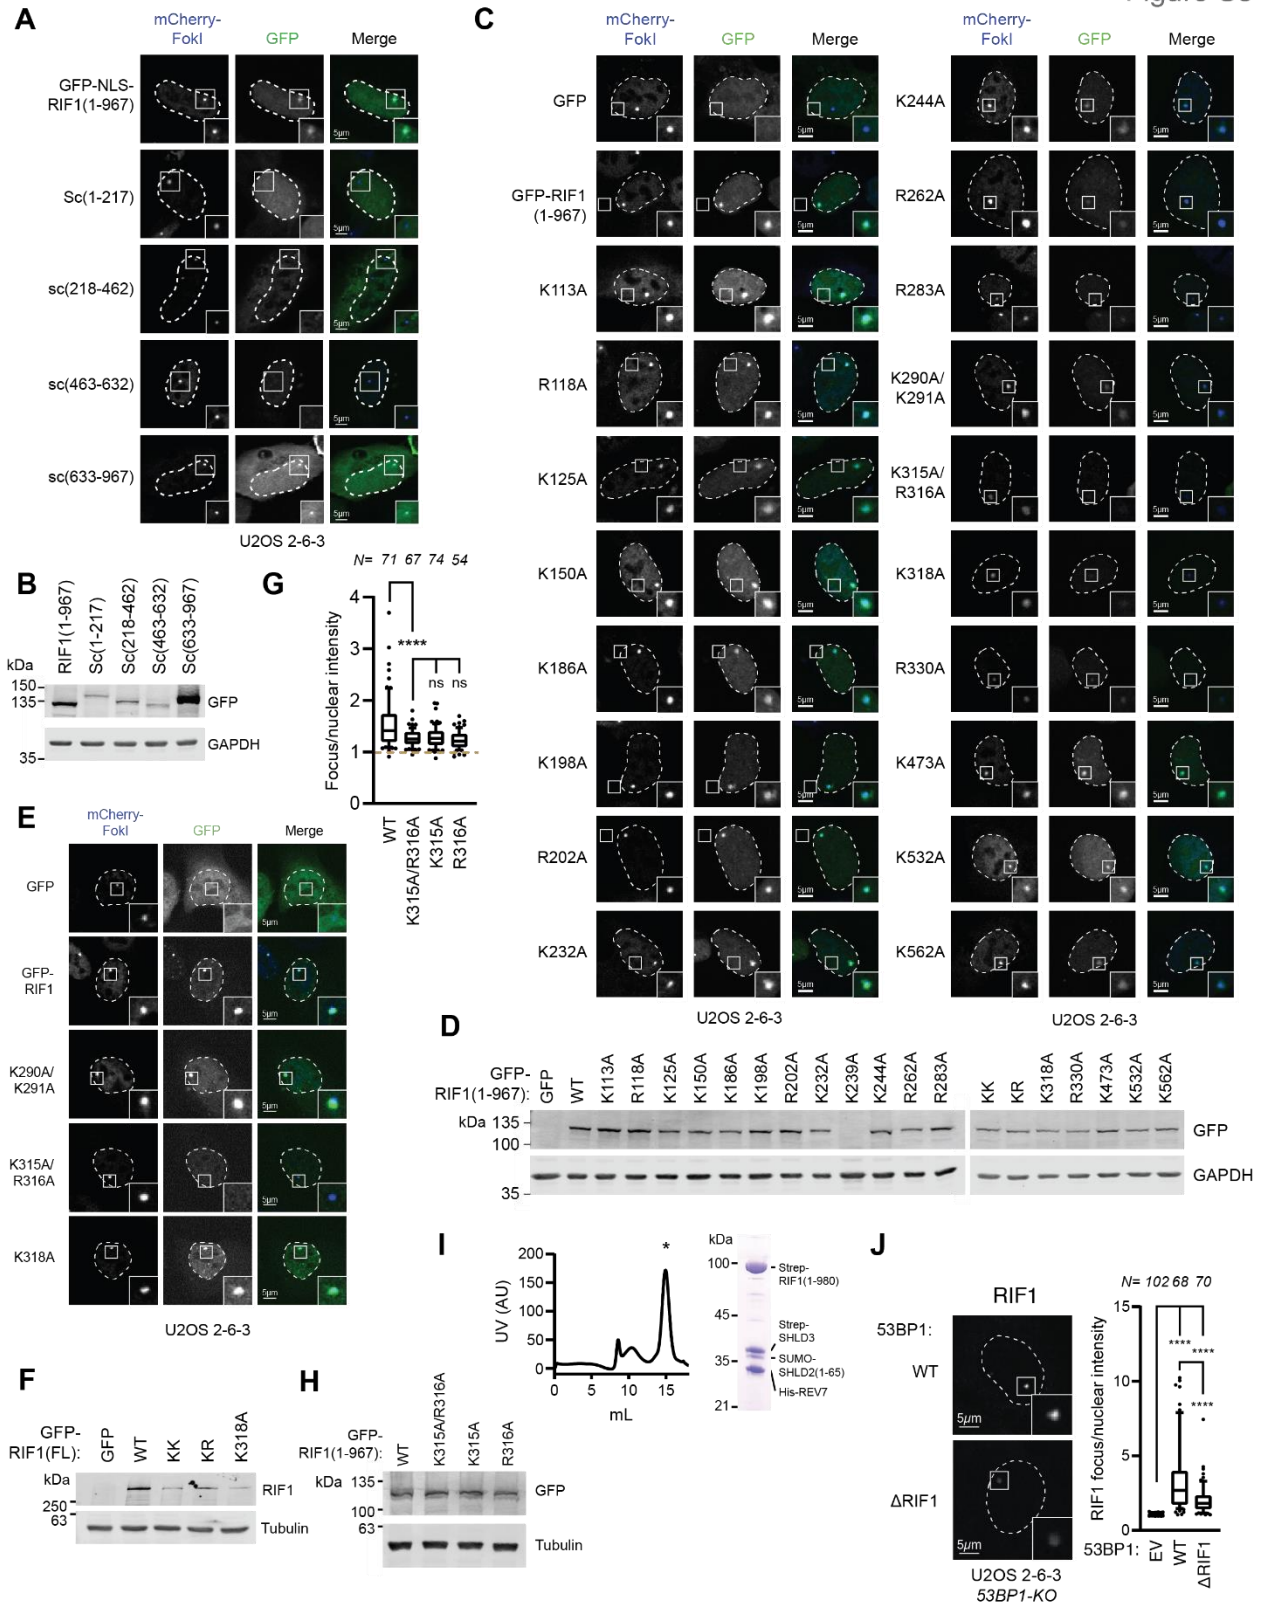

**Figure S5. RIF1 recruitment requires conserved basic residues, related to Figure 5**

(A) Representative micrographs of the GFP-RIF1 and FokI-induced DSB colocalization data shown in [Figure 5B](#).

(B) Immunoblotting of whole cell extracts of U2OS 2-6-3 cells expressing the indicated GFP-RIF1(1-967) variants containing segments substituted with ScRif1 used in [Figure 5B](#). GAPDH was used as a loading control.

(C-D) Representative micrographs of the GFP-RIF1(1-967) and FokI-induced DSB colocalization data shown in [Figure 5C](#) are shown in (C). Immunoblotting of whole cell extracts of U2OS 2-6-3 cells expressing the indicated GFP-RIF1(1-967) variants is shown in (D). GAPDH was used as a loading control. KK, K290A/K291A; KR, K315A/R316A.

(E) Representative micrographs of the GFP-RIF1 and FokI-DSB colocalization data shown in [Figure 5D](#).

(F) Immunoblotting of whole cell extracts of U2OS 2-6-3 cells expressing the indicated GFP-RIF1 variants. Tubulin was used as a loading control. KK, K290A/K291A; KR, K315A/R316A.

(G) Quantitation of colocalization between the indicated GFP-RIF1(1-967) variants and FokI-induced DSBs in U2OS 2-6-3 evaluated by immunofluorescence. Fluorescence intensity relative to nuclear signal is shown. Data from three biological replicates are presented as boxplots. Whiskers indicate 10<sup>th</sup> and 90<sup>th</sup> percentiles, while the box indicate median and 25<sup>th</sup> and 75<sup>th</sup> percentiles.

(H) Immunoblotting of whole cell extracts of U2OS 2-6-3 cells expressing the indicated GFP-RIF1(1-967) variants used in (G). Tubulin was used as a loading control.

(I) Size exclusion chromatography of purified Strep-RIF1(1-980)-Strep-SHLD3-SUMO-SHLD2(1-65)-His-REV7. Peak marked by the asterisk was analyzed by Coomassie-stained SDS-PAGE analysis and shown.

(J) Left, representative micrographs of U2OS 2-6-3 *53BP1-KO* cells transfected with the indicated 53BP1 constructs and evaluated for RIF1 colocalization with FokI-induced DSBs. Right, quantitation of RIF1 colocalization with FokI-induced DSBs. Fluorescence intensity

relative to nuclear signal is shown. Data is presented as boxplots. Whiskers indicate 10<sup>th</sup> and 90<sup>th</sup> percentiles, while the box indicate median and 25<sup>th</sup> and 75<sup>th</sup> percentiles.

**Table S1. Validation of detected crosslinks using REV7-SHLD3-SHLD2 structure (6KTO), related to Figure 4G.**

| REV7-SHLD3 interlinks |       |                        |                        |
|-----------------------|-------|------------------------|------------------------|
| REV7                  | SHLD3 | Distance to C-REV7 (Å) | Distance to O-REV7 (Å) |
| 209                   | 25    | 49.0                   | 14.1                   |
| 44                    | 25    | 41.1                   | 33.4                   |
| 90                    | 25    | 56.2                   | 11.7                   |
| 162                   | 25    | 56.6                   | 29.7                   |
| 190                   | 25    | 29.2                   | 45.3                   |
| 198                   | 25    | 33.6                   | 29.3                   |
| 167                   | 25    | 61.7                   | 40.9                   |
| 167                   | 54    | 11.6                   | 70.3                   |
| 162                   | 54    | 15.3                   | 67.8                   |

  

| REV7-REV7 intralinks |           |                               |                               |                               |                               |
|----------------------|-----------|-------------------------------|-------------------------------|-------------------------------|-------------------------------|
| Residue 1            | Residue 2 | Distance in C-REV7-C-REV7 (Å) | Distance in O-REV7-O-REV7 (Å) | Distance in C-REV7-O-REV7 (Å) | Distance in O-REV7-C-REV7 (Å) |
| 44                   | 162       | 34.6                          | 39.3                          | 52.2                          | 41.9                          |
| 209                  | 198       | 32.0                          | 29.4                          | 27.0                          | 19.9                          |
| 190                  | 162       | 30.1                          | 23.4                          | 41.8                          | 66.5                          |
| 209                  | 90        | 11.5                          | 11.1                          | 46.7                          | 47.4                          |
| 209                  | 44        | 29.4                          | 29.6                          | 25.5                          | 34.2                          |
| 209                  | 190       | 24.4                          | 47.4                          | 34.3                          | 18.2                          |
| 167                  | 198       | 31.0                          | 24.9                          | 55.0                          | 56.5                          |
| 209                  | 167       | 35.4                          | 46.7                          | 48.1                          | 49.3                          |
| 209                  | 162       | 35.7                          | 38.1                          | 47.8                          | 43.1                          |
| 162                  | 198       | 23.6                          | 21.0                          | 52.4                          | 51.1                          |
| 167                  | 190       | 34.8                          | 18.1                          | 68.1                          | 47.2                          |

  

| SHLD3-SHLD2 interlinks |       |              |
|------------------------|-------|--------------|
| SHLD3                  | SHLD2 | Distance (Å) |
| 25                     | 51    | 18.6         |

  

| SHLD3-SHLD3 intralinks |           |              |
|------------------------|-----------|--------------|
| Residue 1              | Residue 2 | Distance (Å) |
| 48                     | 25        | 51.8         |
| 25                     | 54        | 58.8         |

Short unresolved loops were modeled in using SwissModel. Highlighted cells show the shortest Ca-Ca distance
